# Supplementary material for: A MnS/MnO-coated S,N-doped carbon anode obtained from a Mn(ii)-coordinated polymer for long-cycle life Li-ion batteries
Source: Royal Society of Chemistry journal article supplement (doi:10.1039/d4ma00066h), 2024-01-01
Supplement: d4ma00066h1.pdf [file d4ma00066h1.pdf]

Supporting Information

**MnS/MnO-coated N, S-doped Carbon Anode obtained  
from a Mn(II)-coordinated Polymer for Long-cycle Life  
Li-ion Batteries**

Kyubin Shim<sup>a1</sup>, Hyun Woo Kim<sup>a1</sup>, Sungwoo Park<sup>a</sup>, Kyeong-Deok Seo<sup>b</sup>, Chang-Yeon Kim<sup>a</sup>,  
Jin Bae Lee<sup>a</sup>, Jong Seong Bae<sup>c</sup> and Hae Jin Kim<sup>a\*</sup>

<sup>a</sup> Research Center for Materials Analysis, Korea Basic Science Institute, Daejeon 34133,  
Republic of Korea

<sup>b</sup> Department of Chemistry and Chemistry Institute for Functional Materials, Pusan National  
University, Busan 46241, Republic of Korea

<sup>c</sup> Busan Center, Korea Basic Science Institute, Busan 46742, Republic of Korea

\* Corresponding author: H. J. Kim; E-mail address: [hansol@kbsi.re.kr](mailto:hansol@kbsi.re.kr)

<sup>1</sup>The first two authors contributed equally to this work.

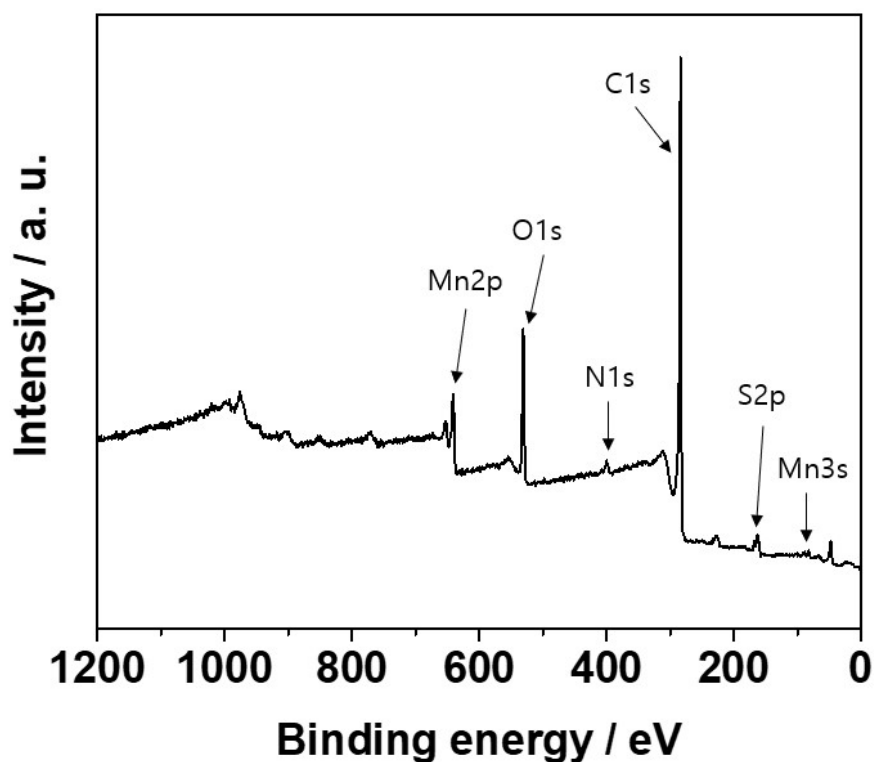

**Figure S1.** XPS survey spectra of MSNC (powder samples).

**Table S1.** Peak positions of the XPS (powder sample)

(Unit: eV)

| C1s           |               |          | N1s                    |                        |                     | O1s                        |        |        |
|---------------|---------------|----------|------------------------|------------------------|---------------------|----------------------------|--------|--------|
| C-C           | C-O/C-N/C-S   | C=O      | Pyrrolic-N             | quaternary-N           | Pyndinic-N          | Metal-O                    | C-O    | C=O    |
| 284.61        | 285.77        | 288.36   | 400.59                 | 401.66                 | 398.46              | 529.62                     | 531.39 | 533.05 |
| S2p           |               |          | Mn2p                   |                        |                     |                            |        |        |
| C-S-C         | MnS           | Sulphate | Mn <sup>2+</sup> (MnO) | Mn <sup>2+</sup> (MnS) | Mn <sup>3+,4+</sup> | Mn <sup>2+</sup> satellite |        |        |
| 163.57/164.78 | 160.81/162.08 | 168.23   | 640.77                 | 642.41                 | 644.08              | 646.77                     |        |        |

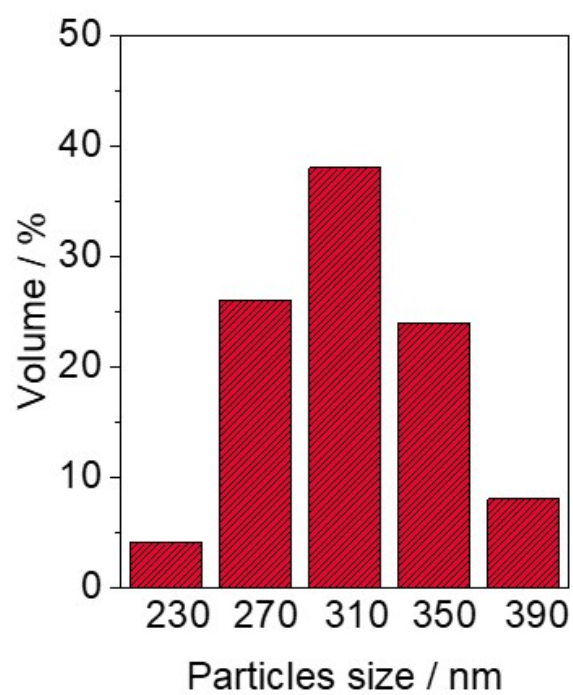

**Figure S2.** Size distribution of MSMC powders.

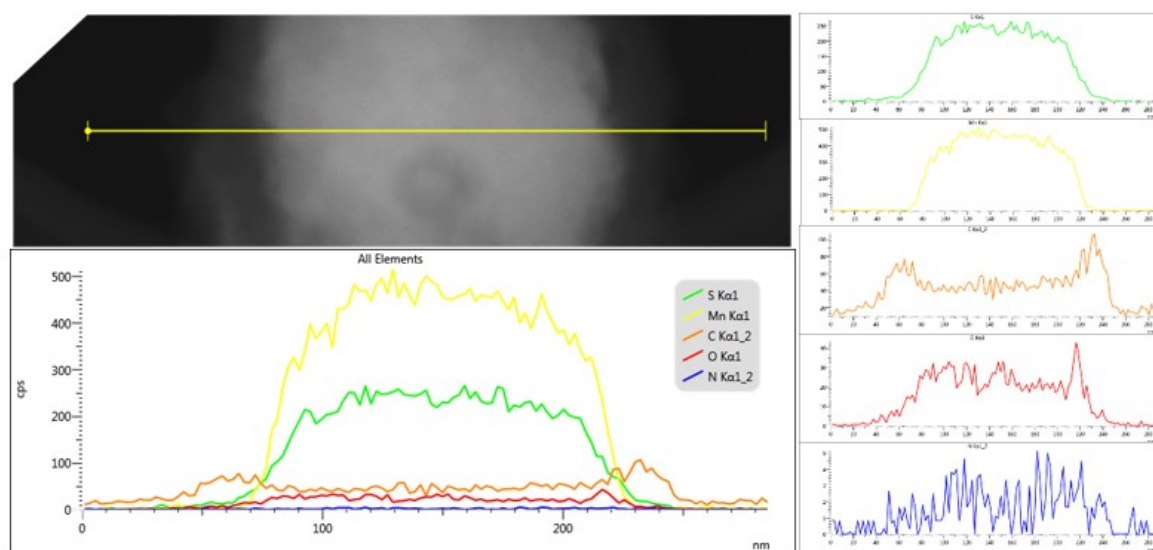

**Figure S3.** Line profile of the core-shell structure for MSNC.

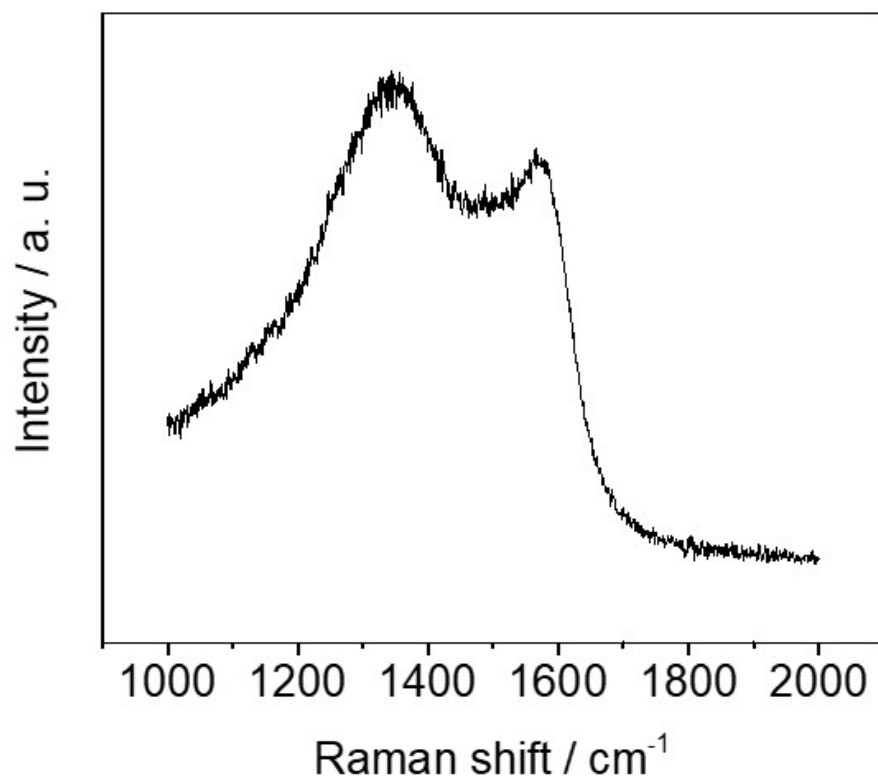

**Figure S4.** Electrochemical active surface area (ECSA) test using the double-layer capacitance of the MSNC.

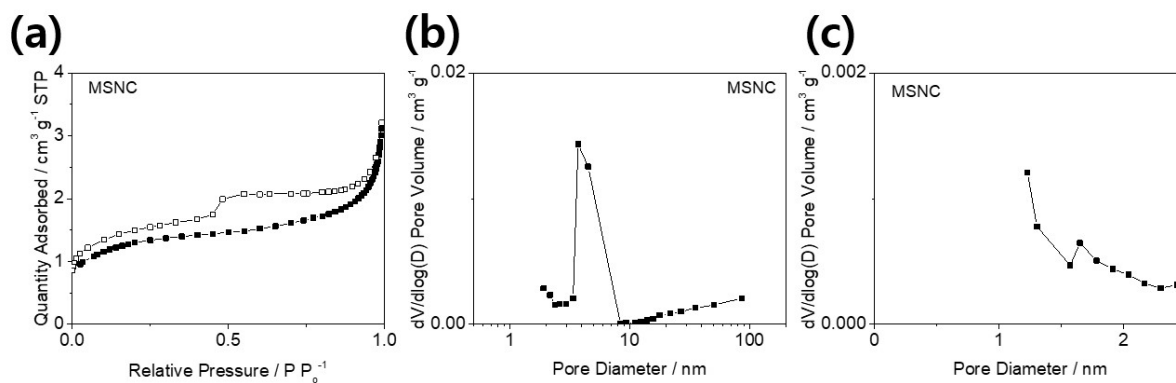

**Figure S5.** (a)  $N_2$  adsorption-desorption isotherms of the sample at 77K. (b) Pore size distributions of the samples obtained by the BJH method (desorption branch) and (c) the HK method (adsorption branch).

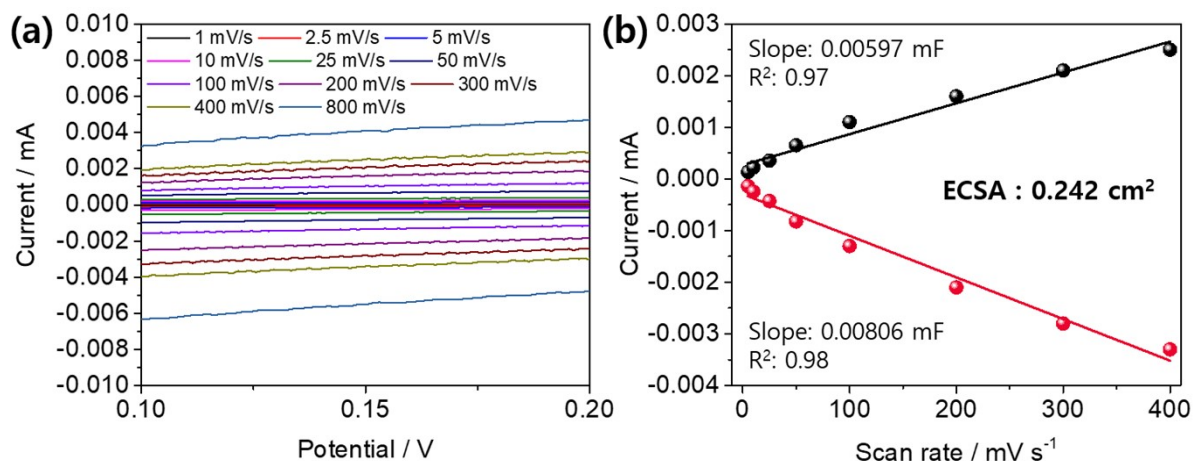

**Figure S6.** Electrochemical active surface area (ECSA) test using the double-layer capacitance of the MSNC.

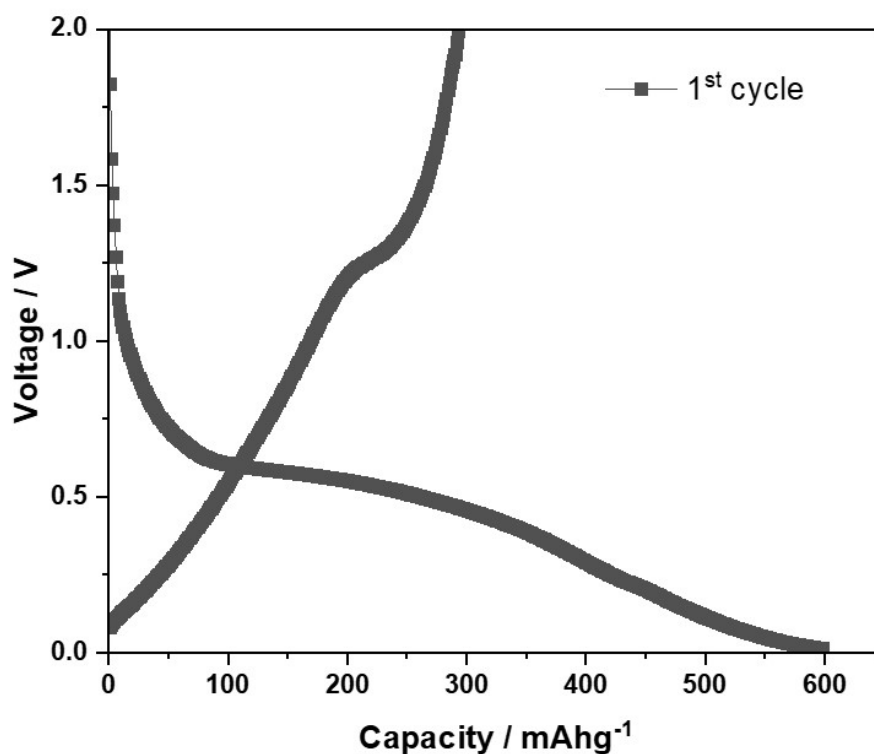

**Figure S7.** Discharge/charge profile of the Li/MSNC cell for the 1<sup>st</sup> cycle.

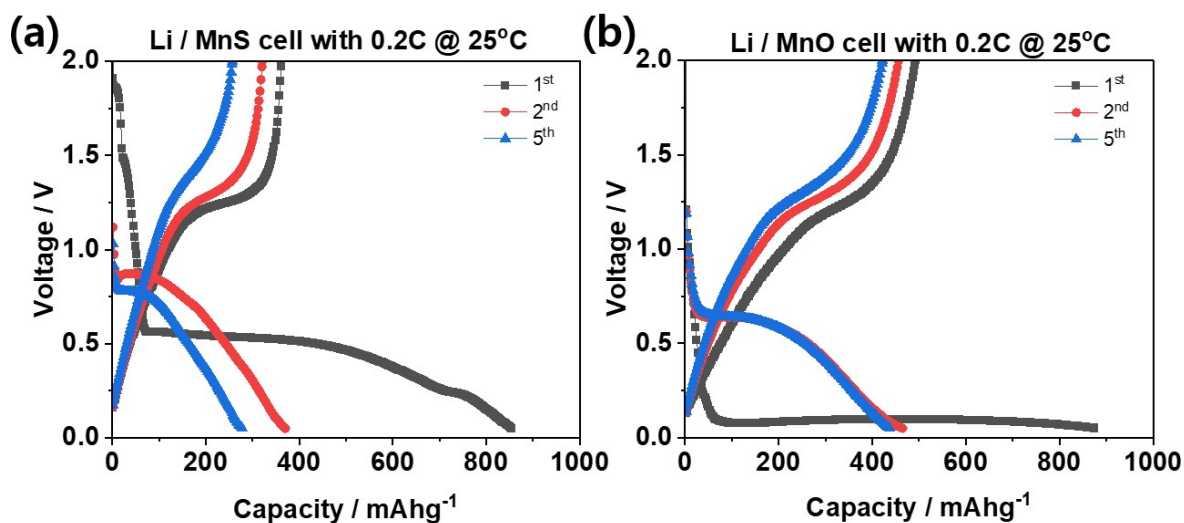

**Figure S8.** Discharge/charge profile of the for the 1<sup>st</sup>, 2<sup>nd</sup>, and 5<sup>th</sup> cycle (a) Li/MnS cell, (b) Li/MnO cell

Figures S8 illustrates the discharge/charge curves of the MnS and MnO electrode for 5 cycles at a rate of 0.2C, ranging from 0.05 to 2.0 V. The MnS and MnO electrode initially exhibits discharge and charge capacities of 854 and 357 mA h g<sup>-1</sup>(MnS), 880 and 495 mA h g<sup>-1</sup> (MnO), respectively.

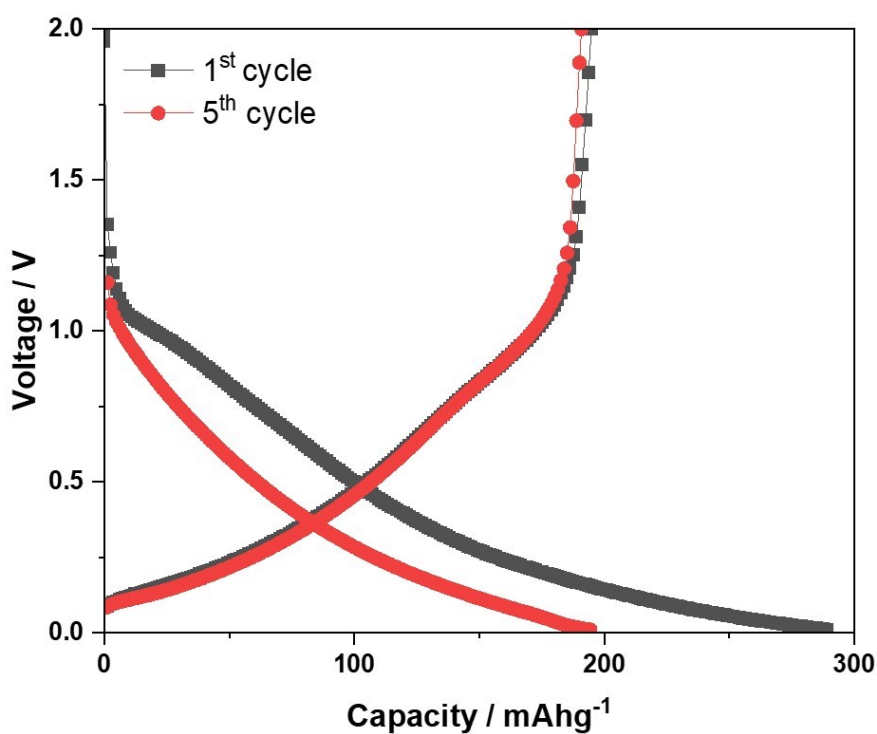

**Figure S9.** Discharge/Charge profile of the Li/HC cell.

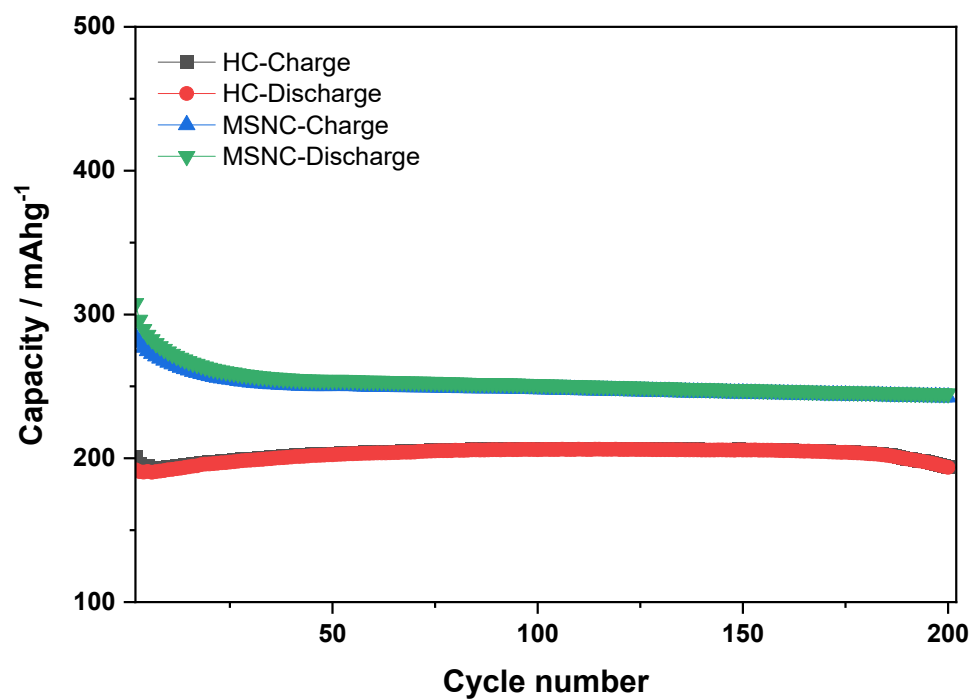

**Figure S10.** Comparison of the cyclability of MSNC and HC cells for up to 200 cycles with 0.2 C.

**Table S2.** Electrochemical performances comparison of MSNC anodes with recently reported Mn-based carbon composite anodes

|           | Composition          | Organic compounds (%) | Initial electrochemical performances |                |                        |                     | Cycle stability (mAh/g @ n cycle) |
|-----------|----------------------|-----------------------|--------------------------------------|----------------|------------------------|---------------------|-----------------------------------|
|           |                      |                       | Discharge (mAh/g)                    | Charge (mAh/g) | Current density (mA/g) | Voltage cut-off (V) |                                   |
| This work | MnS/MnO@N,S-C        | 71.34                 | 598                                  | 293            | 74.4                   | 0.05 - 2            | 232 @ 500                         |
| R1        | MnO/MnS@N,S-C        | 20.45                 | 535                                  | 530            | 100                    | 0.01 - 3            | 574 @ 500                         |
| R2        | 2AQ-MnO <sub>2</sub> | 73.3                  | 965.7                                | 465.6          | 100                    | 0.005 - 3           | 756 @ 200                         |
| R3        | MnO/MnS-C            | -                     | ~1480                                | ~980           | 100                    | 0.01 - 3            | 534 @ 300                         |
| R4        | MnO/C                | 46.3                  | ~2130                                | ~1100          | 100                    | 0.05 - 3            | 741 @ 300                         |
| R5        | MnO@C/CNTs           | 19.41                 | 1089                                 | 735            | 200                    | 0.05 - 3            | 1266 @ 300                        |
| R6        | $\alpha$ -MnS/C      | 35.9                  | ~900                                 | ~590           | 200                    | 0.01 - 3            | 672 @ 200                         |
| R7        | MnS@N,S-C            | -                     | 840                                  | 750            | 100                    | 0.01 - 3            | 282 @ 500                         |

[R1] K. Wang, K. Zhao, Y. Wang, H. Li, H. Jiang, L. Chen, N, S co-doped carbon confined MnO/MnS heterostructures derived from a one-step pyrolysis of Mn-methionine frameworks for advanced lithium storage, *J. Alloys compd.*, 2021, **860**, 158451.

[R2] Y. Cao, W. Sun, C. Guo, L. Zheng, M. Yao, Y. Wang, Rational Construction of Yolk-Shell Bimetal Modified Quinonyl-Rich Covalent Organic Polymers with Ultralong Lithium-Storage Mechanism, *ACS Nano*, 2022, **16**, 9830-9842.

[R3] S. Ru, H. Xiao, G. Ma, J. Tan, X. Wang, Z. Ai, Facile synthesis of carbon embedded dual phase MnO/MnS nanoparticles composite for superior lithium storage performance, *Mater. Lett.*, 2020, **276**, 128244.

[R4] J. Zhu, X. Zuo, X. Chen, Y. Ding, MOF-derived MnO/C composites as high-performance lithium-ion battery anodes, *Synth. Met.*, 2021, **280**, 116872.

[R5] X. Jiang, W. Yu, H. Wang, H. Xu, X. Liu, Y. Ding, Enhancing the performance of MnO by double carbon modification for advanced lithium-ion battery anodes, *J. Mater. Chem. A*, 2016, **4**, 920.

[R6] S.Y. Zhu, Y.F. Yuan, P.F. Du, M. Zhu, Y.B. Chen, S.Y. Guo,  $\alpha$ -MnS nanoparticles in-situ anchored in 3D macroporous honeycomb carbon as high-performance anode for Li-ion batteries, *Appl. Surf. Sci.*, 2023, **616**, 156619.

[R7] J. Chen, J. Cong, Y. Chen, Q. Wang, M. Shi, X. Liu, H. Yang, MnS nanoparticles embedded in N, S co-doped carbon nanosheets for superior lithium-ion storage, *Appl. Surf. Sci.*, 2020, **508**, 145239.



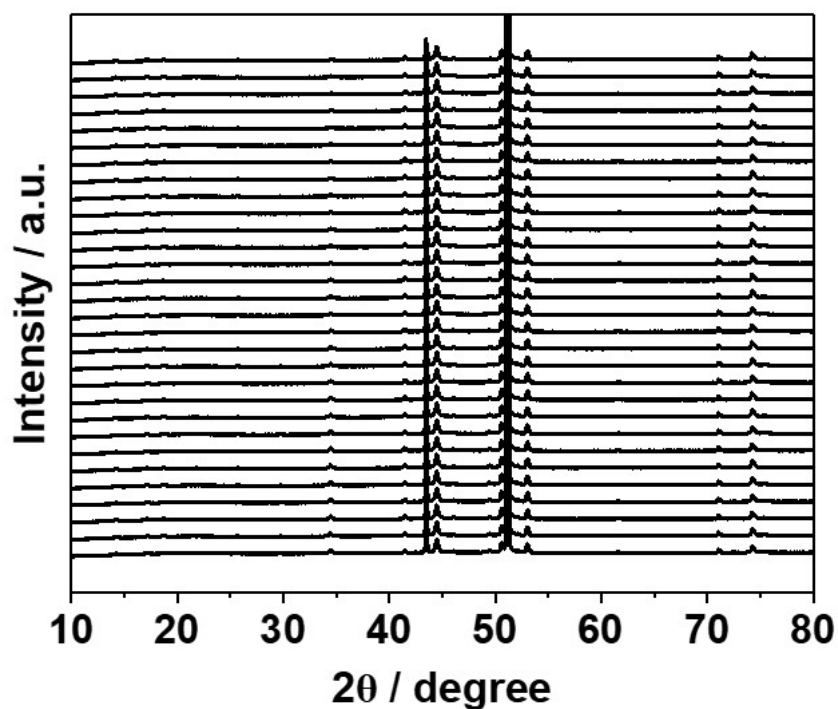

**Figure S11.** *In-situ* XRD measurements of Li/MSNC cells during discharge/charge.

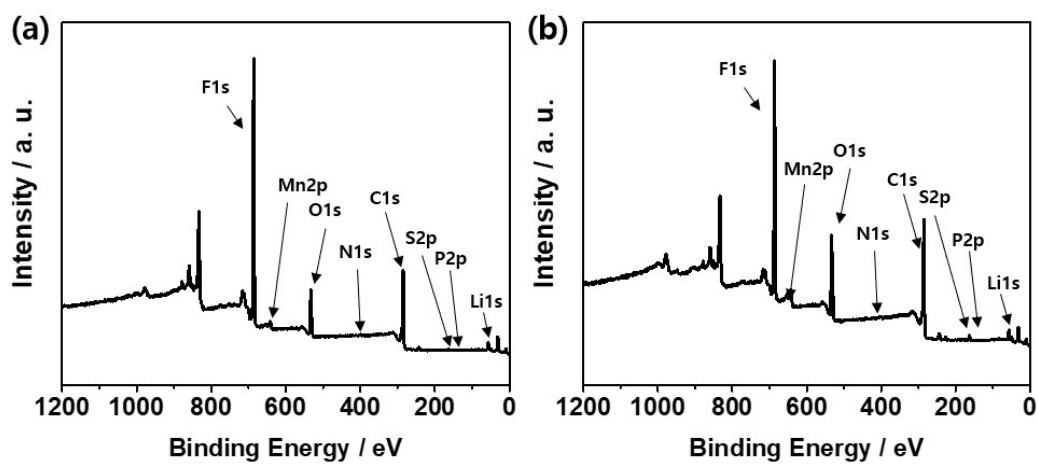

**Figure S12.** XPS spectra (survey) of the MSNC electrode (a) after one cycle and (b) after 20 cycles.

**Table S3.** XPS peak positions (after one cycle)

(Unit: eV)

| C1s    |             |          |                   | Mn2P                   |                        |                     |                            |
|--------|-------------|----------|-------------------|------------------------|------------------------|---------------------|----------------------------|
| C-C    | C-O/C-N/C-S | C=O      | C-F               | Mn <sup>2+</sup> (MnO) | Mn <sup>2+</sup> (MnS) | Mn <sup>3+,4+</sup> | Mn <sup>2+</sup> satellite |
| 284.64 | 285.85      | 287.68   | 289.88            | 640.30                 | 641.78                 | 644.35              | 646.98                     |
| S2p    |             |          | O1s               |                        |                        | Li1s                |                            |
| MnS    | C-S-C       | Sulphate | Li <sub>2</sub> O | MnO                    | C=O                    | LiF                 | Li <sub>2</sub> O          |
| 161.60 | 162.98      | 169.74   | 528.39            | 529.38                 | 532.20                 | 56.03               | 56.51                      |

**Table S4.** XPS peak positions (after 20 cycles)

(Unit: eV)

| C1s    |             |          |                   | Mn2P                   |                        |                     |                            |
|--------|-------------|----------|-------------------|------------------------|------------------------|---------------------|----------------------------|
| C-C    | C-O/C-N/C-S | C=O      | C-F               | Mn <sup>2+</sup> (MnO) | Mn <sup>2+</sup> (MnS) | Mn <sup>3+,4+</sup> | Mn <sup>2+</sup> satellite |
| 284.60 | 285.78      | 287.65   | 290.75            | 640.22                 | 641.68                 | 644.29              | 646.72                     |
| S2p    |             |          | O1s               |                        |                        | Li1s                |                            |
| MnS    | C-S-C       | Sulphate | Li <sub>2</sub> O | MnO                    | C=O                    | LiF                 | Li <sub>2</sub> O          |
| 161.89 | 163.21      | 169.81   | 529.77            | 529.59                 | 532.58                 | 56.24               | 57.24                      |

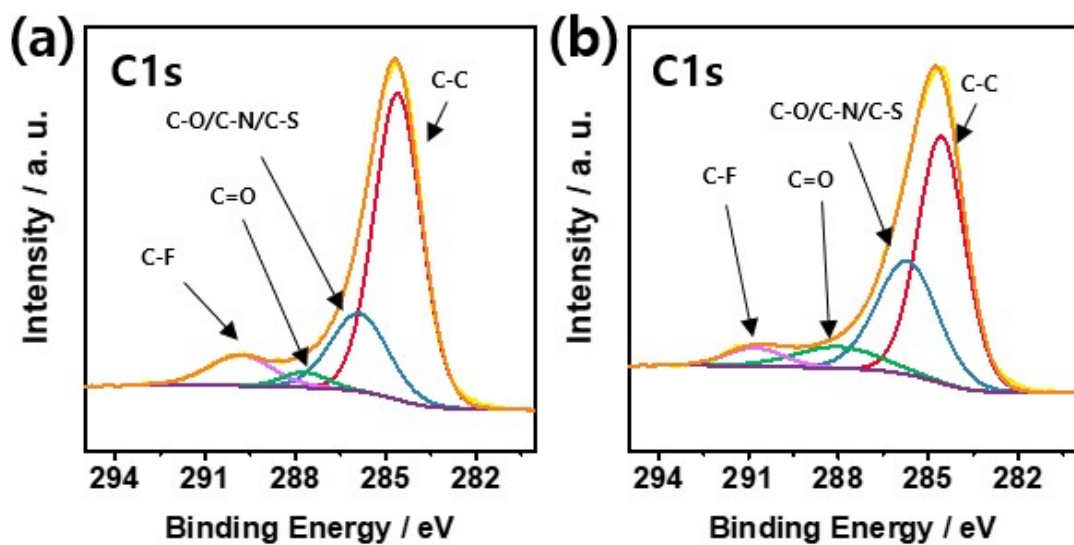

**Figure S13.** High-resolution C1s spectra of the MSNC electrode (a) after one cycle and (b) after 20 cycles.

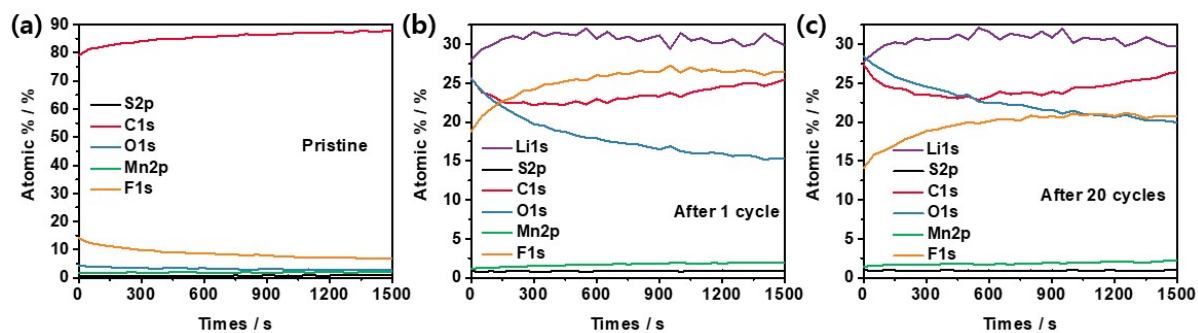

**Figure S14.** XPS depth study of the MSNC electrode (a) pristine, (b) after one cycle, and (c) after 20 cycles.
